# Supplementary material for: Identification and Characterization of Microsatellites in Expressed Sequence Tags and Their Cross Transferability in Different Plants
Source: Hindawi journal article supplement (doi:10.1155/2014/863948), 2014-01-01
Supplement: f1 [file 863948.f1.pdf]

**Supplementary table:** Details of best promising Hits of ESTs having SSR were obtained through Fastannotator.

| Serial No | Entry                               | Biological Process                                                                                                                                                                                                                                        | Cellular Component                          | Molecular Function                                                                                                                                                                                                                                                                                     |
|-----------|-------------------------------------|-----------------------------------------------------------------------------------------------------------------------------------------------------------------------------------------------------------------------------------------------------------|---------------------------------------------|--------------------------------------------------------------------------------------------------------------------------------------------------------------------------------------------------------------------------------------------------------------------------------------------------------|
| 1         | gi 17519141 gb BM188183.1 BM188183  | GO:0009813 flavonoid biosynthetic process<br>GO:0042398 cellular modified amino acid biosynthetic process<br>GO:0080167 response to karrikin                                                                                                              |                                             | GO:0045430 chalcone isomerase activity                                                                                                                                                                                                                                                                 |
| 2         | gi 54682355 gb CV656076.1 CV656076  | GO:0009813 flavonoid biosynthetic process                                                                                                                                                                                                                 |                                             | GO:0016210 naringenin-chalcone synthase activity                                                                                                                                                                                                                                                       |
| 3         | gi 71820633 gb DR998024.1 DR998024  | GO:0055114 oxidation-reduction process<br>GO:0006558 L-phenylalanine metabolic process<br>GO:0009805 coumarin biosynthetic process<br>GO:0009809 lignin biosynthetic process<br>GO:0009811 stilbene biosynthetic process<br>GO:0006118 electron transport |                                             | GO:0020037 heme binding<br>GO:0016710 trans-cinnamate 4-monooxygenase activity<br>GO:0009055 electron carrier activity                                                                                                                                                                                 |
| 4         | gi 25799294 gb CA755255.1 CA755255  | GO:0009809 lignin biosynthetic process<br>GO:0055114 oxidation-reduction process<br>GO:0009805 coumarin biosynthetic process<br>GO:0009811 stilbene biosynthetic process                                                                                  |                                             | GO:0045551 cinnamyl-alcohol dehydrogenase activity<br>GO:0000166 nucleotide binding<br>GO:0008270 zinc ion binding<br>GO:0052747 sinapyl alcohol dehydrogenase activity                                                                                                                                |
| 5         | gi 56431124 gb CX023192.1 CX023192  | GO:0051555 flavonol biosynthetic process<br>GO:0055114 oxidation-reduction process                                                                                                                                                                        | GO:0005737 cytoplasm                        | GO:0045486 naringenin 3-dioxygenase activity<br>GO:0045431 flavonol synthase activity<br>GO:0031418 L-ascorbic acid binding<br>GO:0005506 iron ion binding<br>GO:0016702 oxidoreductase activity, acting on single donors with incorporation of molecular oxygen, incorporation of two atoms of oxygen |
| 6         | gi 226808327 gb GO563021.1 GO563021 | GO:0009414 response to water deprivation<br>GO:0006073 cellular glucan metabolic process                                                                                                                                                                  | GO:0005618 cell wall<br>GO:0048046 apoplast | GO:0016762 xyloglucan:xyloglucosyl transferase activity<br>GO:0033946 xyloglucan-specific endo-beta-1,4-glucanase activity                                                                                                                                                                             |
| 7         | gi 209724892 gb BW669581.1 BW669581 | GO:0006073 cellular glucan metabolic process<br>GO:0007047 cellular cell wall organization                                                                                                                                                                | GO:0005618 cell wall<br>GO:0048046 apoplast | GO:0016762 xyloglucan:xyloglucosyl transferase activity<br>GO:0004553 hydrolase activity, hydrolyzing O-                                                                                                                                                                                               |

|    |                                     |                                                                                                                                                                                                                                                                                                                                  |                                                                            |                                                                                                                                                                      |
|----|-------------------------------------|----------------------------------------------------------------------------------------------------------------------------------------------------------------------------------------------------------------------------------------------------------------------------------------------------------------------------------|----------------------------------------------------------------------------|----------------------------------------------------------------------------------------------------------------------------------------------------------------------|
|    |                                     |                                                                                                                                                                                                                                                                                                                                  |                                                                            | glycosyl compounds                                                                                                                                                   |
| 8  | gi 209724609 gb BW677716.1 BW677716 | GO:0009651 response to salt stress<br>GO:0018279 protein N-linked glycosylation via asparagine                                                                                                                                                                                                                                   | GO:0005886 plasma membrane<br>GO:0008250 oligosaccharyltransferase complex | GO:0004579 dolichyl-diphosphooligosaccharide-protein glycotransferase activity                                                                                       |
| 9  | gi 55857142 gb CV881934.1 CV881934  | GO:0009414 response to water deprivation<br>GO:0006073 cellular glucan metabolic process                                                                                                                                                                                                                                         | GO:0005618 cell wall<br>GO:0048046 apoplast                                | GO:0016762 xyloglucan:xyloglucosyl transferase activity<br>GO:0033946 xyloglucan-specific endo-beta-1,4-glucanase activity                                           |
| 10 | gi 27387337 gb CA900345.1 CA900345  | GO:0009399 nitrogen fixation<br>GO:0006542 glutamine biosynthetic process<br>GO:0009252 peptidoglycan biosynthetic process                                                                                                                                                                                                       | GO:0005737 cytoplasm                                                       | GO:0004356 glutamate-ammonia ligase activity<br>GO:0005524 ATP binding                                                                                               |
| 11 | gi 56162853 gb CV986979.1 CV986979  | GO:0055114 oxidation-reduction process                                                                                                                                                                                                                                                                                           |                                                                            | GO:0033788 leucoanthocyanidin reductase activity<br>GO:0000166 nucleotide binding                                                                                    |
| 12 | gi 254066103 gb GR726006.1 GR726006 | GO:0009240 isopentenyl diphosphate biosynthetic process<br>GO:0015995 chlorophyll biosynthetic process<br>GO:0009908 flower development<br>GO:0016114 terpenoid biosynthetic process<br>GO:0009060 aerobic respiration<br>GO:0006096 glycolysis<br>GO:0046686 response to cadmium ion<br>GO:0006694 steroid biosynthetic process | GO:0005829 cytosol<br>GO:0005739 mitochondrion<br>GO:0009507 chloroplast   | GO:0004452 isopentenyl-diphosphate delta-isomerase activity<br>GO:0016787 hydrolase activity                                                                         |
| 13 | gi 182974060 gb FF599768.1 FF599768 | GO:0035634 response to stilbenoid<br>GO:0006695 cholesterol biosynthetic process<br>GO:0016114 terpenoid biosynthetic process                                                                                                                                                                                                    | GO:0005777 peroxisome<br>GO:0005829 cytosol<br>GO:0005739 mitochondrion    | GO:0030145 manganese ion binding<br>GO:0016787 hydrolase activity<br>GO:0000287 magnesium ion binding<br>GO:0004452 isopentenyl-diphosphate delta-isomerase activity |
| 14 | gi 209712696 gb BW684626.1 BW684626 | GO:0015995 chlorophyll biosynthetic process<br>GO:0009908 flower development<br>GO:0015979 photosynthesis<br>GO:0006694 steroid biosynthetic process<br>GO:0016114 terpenoid biosynthetic process                                                                                                                                | GO:0009507 chloroplast<br>GO:0005829 cytosol<br>GO:0005739 mitochondrion   | GO:0046872 metal ion binding<br>GO:0016787 hydrolase activity<br>GO:0004452 isopentenyl-diphosphate delta-isomerase activity                                         |
| 15 | gi 209728353 gb BW659990.1 BW659990 | GO:0009240 isopentenyl diphosphate biosynthetic process<br>GO:0015995 chlorophyll biosynthetic process                                                                                                                                                                                                                           | GO:0005829 cytosol<br>GO:0005739 mitochondrion                             | GO:0004452 isopentenyl-diphosphate delta-isomerase activity<br>GO:0016787 hydrolase activity                                                                         |

|    |                                     |                                                                                                                                                                                                                                                                                                                                                                                                                            |                                                                                                                                    |                                                                                                                                                                                                   |
|----|-------------------------------------|----------------------------------------------------------------------------------------------------------------------------------------------------------------------------------------------------------------------------------------------------------------------------------------------------------------------------------------------------------------------------------------------------------------------------|------------------------------------------------------------------------------------------------------------------------------------|---------------------------------------------------------------------------------------------------------------------------------------------------------------------------------------------------|
|    |                                     | GO:0009908 flower development<br>GO:0050992 dimethylallyl diphosphate biosynthetic process<br>GO:0009060 aerobic respiration<br>GO:0006096 glycolysis<br>GO:0015979 photosynthesis<br>GO:0046686 response to cadmium ion<br>GO:0006694 steroid biosynthetic process<br>GO:0016114 terpenoid biosynthetic process                                                                                                           | GO:0009536 plastid                                                                                                                 |                                                                                                                                                                                                   |
| 16 | gi 209727623 gb BW663783.1 BW663783 | GO:0009240 isopentenyl diphosphate biosynthetic process<br>GO:0015995 chlorophyll biosynthetic process<br>GO:0009908 flower development<br>GO:0050992 dimethylallyl diphosphate biosynthetic process<br>GO:0016114 terpenoid biosynthetic process<br>GO:0015979 photosynthesis<br>GO:0006694 steroid biosynthetic process                                                                                                  | GO:0005829 cytosol<br>GO:0005739 mitochondrion<br>GO:0009507 chloroplast                                                           | GO:0004452 isopentenyl-diphosphate delta-isomerase activity<br>GO:0016787 hydrolase activity                                                                                                      |
| 17 | gi 209712023 gb BW668424.1 BW668424 | GO:0009240 isopentenyl diphosphate biosynthetic process<br>GO:0015995 chlorophyll biosynthetic process<br>GO:0009908 flower development<br>GO:0050992 dimethylallyl diphosphate biosynthetic process<br>GO:0009060 aerobic respiration<br>GO:0006096 glycolysis<br>GO:0015979 photosynthesis<br>GO:0046686 response to cadmium ion<br>GO:0006694 steroid biosynthetic process<br>GO:0016114 terpenoid biosynthetic process | GO:0005829 cytosol<br>GO:0005739 mitochondrion<br>GO:0009536 plastid                                                               | GO:0004452 isopentenyl-diphosphate delta-isomerase activity<br>GO:0016787 hydrolase activity                                                                                                      |
| 18 | gi 71824350 gb DT001742.1 DT001742  | GO:0034265 isopentenyl adenine biosynthetic process<br>GO:0008033 tRNA processing                                                                                                                                                                                                                                                                                                                                          | GO:0005634 nucleus<br>GO:0009536 plastid                                                                                           | GO:0052622 ATP dimethylallyltransferase activity<br>GO:0005524 ATP binding<br>GO:0009824 AMP dimethylallyltransferase activity<br>GO:0052623 ADP dimethylallyltransferase activity                |
| 19 | gi 226770420 gb GO523629.1 GO523629 | GO:0006633 fatty acid biosynthetic process<br>GO:0055114 oxidation-reduction process<br>GO:0042967 acyl-carrier-protein biosynthetic process                                                                                                                                                                                                                                                                               | GO:0005835 fatty acid synthase complex<br>GO:0009941 chloroplast envelope<br>GO:0009570 chloroplast stroma<br>GO:0009579 thylakoid | GO:0016631 enoyl-[acyl-carrier-protein] reductase activity<br>GO:0005507 copper ion binding<br>GO:0004318 enoyl-[acyl-carrier-protein] reductase (NADH) activity<br>GO:0000166 nucleotide binding |

|    |                                     |                                                                                                                                                                                                                                                                                                                                                                                                                                                                                                                           |                                                                                                             |                                                                                                                                                                                                            |
|----|-------------------------------------|---------------------------------------------------------------------------------------------------------------------------------------------------------------------------------------------------------------------------------------------------------------------------------------------------------------------------------------------------------------------------------------------------------------------------------------------------------------------------------------------------------------------------|-------------------------------------------------------------------------------------------------------------|------------------------------------------------------------------------------------------------------------------------------------------------------------------------------------------------------------|
| 20 | gi 5442510 gb AI822237.1 AI822237   | GO:0006979 response to oxidative stress<br>GO:0006952 defense response<br>GO:0010224 response to UV-B<br>GO:0009611 response to wounding<br>GO:0006559 L-phenylalanine catabolic process<br>GO:0009699 phenylpropanoid biosynthetic process<br>GO:0009555 pollen development<br>GO:0046274 lignin catabolic process<br>GO:0009819 drought recovery<br>GO:0046244 salicylic acid catabolic process<br>GO:0080167 response to karrikin<br>GO:0006570 tyrosine metabolic process<br>GO:0009821 alkaloid biosynthetic process | GO:0005737 cytoplasm                                                                                        | GO:0045548 phenylalanine ammonia-lyase activity                                                                                                                                                            |
| 21 | gi 25802852 gb CA758813.1 CA758813  | GO:0009788 negative regulation of abscisic acid mediated signaling pathway<br>GO:0008360 regulation of cell shape<br>GO:0009414 response to water deprivation<br>GO:0048509 regulation of meristem development<br>GO:0018344 protein geranylgeranylation<br>GO:0018343 protein farnesylation<br>GO:0006694 steroid biosynthetic process<br>GO:0016114 terpenoid biosynthetic process                                                                                                                                      | GO:0005965 protein farnesyltransferase complex<br>GO:0005953 CAAX-protein geranylgeranyltransferase complex | GO:0004662 CAAX-protein geranylgeranyltransferase activity<br>GO:0004660 protein farnesyltransferase activity<br>GO:0004311 farnesyltransferase activity<br>GO:0046982 protein heterodimerization activity |
| 22 | gi 209717502 gb BW654405.1 BW654405 | GO:0042218 1-aminocyclopropane-1-carboxylate biosynthetic process                                                                                                                                                                                                                                                                                                                                                                                                                                                         |                                                                                                             | GO:0030170 pyridoxal phosphate binding<br>GO:0008483 transaminase activity<br>GO:0016847 1-aminocyclopropane-1-carboxylate synthase activity                                                               |
| 23 | gi 209725557 gb BW677859.1 BW677859 | GO:0042218 1-aminocyclopropane-1-carboxylate biosynthetic process<br>GO:0006522 alanine metabolic process<br>GO:0006531 aspartate metabolic process<br>GO:0015976 carbon utilization                                                                                                                                                                                                                                                                                                                                      |                                                                                                             | GO:0030170 pyridoxal phosphate binding<br>GO:0004021 L-alanine:2-oxoglutarate aminotransferase activity<br>GO:0016847 1-aminocyclopropane-1-carboxylate synthase activity                                  |
| 24 | gi 56433440 gb CX024350.1 CX024350  | GO:0009098 leucine biosynthetic process<br>GO:0009651 response to salt stress<br>GO:0009097 isoleucine biosynthetic process<br>GO:0009099 valine biosynthetic process                                                                                                                                                                                                                                                                                                                                                     | GO:0009316 3-isopropylmalate dehydratase complex<br>GO:0009570 chloroplast stroma                           | GO:0003861 3-isopropylmalate dehydratase activity                                                                                                                                                          |
| 25 | gi 25799399 gb CA755360.1 CA755360  | GO:0009094 L-phenylalanine biosynthetic process                                                                                                                                                                                                                                                                                                                                                                                                                                                                           |                                                                                                             | GO:0004664 prephenate dehydratase activity                                                                                                                                                                 |

|    |                                     |                                                                                                                                                                                                                                                                                                                                                                                                                                                                                                                      |                                                                                                                                                           |                                                                                                                                                                                                                                                                                                 |
|----|-------------------------------------|----------------------------------------------------------------------------------------------------------------------------------------------------------------------------------------------------------------------------------------------------------------------------------------------------------------------------------------------------------------------------------------------------------------------------------------------------------------------------------------------------------------------|-----------------------------------------------------------------------------------------------------------------------------------------------------------|-------------------------------------------------------------------------------------------------------------------------------------------------------------------------------------------------------------------------------------------------------------------------------------------------|
|    |                                     | GO:0000162 tryptophan biosynthetic process<br>GO:0006571 tyrosine biosynthetic process                                                                                                                                                                                                                                                                                                                                                                                                                               |                                                                                                                                                           |                                                                                                                                                                                                                                                                                                 |
| 26 | gi 313127819 gb HS106796.1 HS106796 | GO:0006468 protein phosphorylation<br>GO:0007165 signal transduction<br>GO:0009069 serine family amino acid metabolic process                                                                                                                                                                                                                                                                                                                                                                                        |                                                                                                                                                           | GO:0004697 protein kinase C activity<br>GO:0004713 protein tyrosine kinase activity<br>GO:0005524 ATP binding                                                                                                                                                                                   |
| 27 | gi 25799833 gb CA755794.1 CA755794  | GO:0009789 positive regulation of abscisic acid mediated signaling pathway<br>GO:0010111 glyoxysome organization<br>GO:0009611 response to wounding<br>GO:0009695 jasmonic acid biosynthetic process<br>GO:0006635 fatty acid beta-oxidation<br>GO:0006550 isoleucine catabolic process<br>GO:0006552 leucine catabolic process<br>GO:0006574 valine catabolic process<br>GO:0006699 bile acid biosynthetic process<br>GO:0018874 benzoate metabolic process<br>GO:0042967 acyl-carrier-protein biosynthetic process | GO:0005829 cytosol<br>GO:0005777 peroxisome<br>GO:0005739 mitochondrion<br>GO:0005730 nucleolus<br>GO:0005774 vacuolar membrane<br>GO:0009507 chloroplast | GO:0003988 acetyl-CoA C-acyltransferase activity                                                                                                                                                                                                                                                |
| 28 | gi 21620941 gb BQ618947.1 BQ618947  | GO:0006550 isoleucine catabolic process<br>GO:0006552 leucine catabolic process<br>GO:0006574 valine catabolic process<br>GO:0006633 fatty acid biosynthetic process<br>GO:0006699 bile acid biosynthetic process<br>GO:0018874 benzoate metabolic process<br>GO:0042967 acyl-carrier-protein biosynthetic process                                                                                                                                                                                                   | GO:0005777 peroxisome<br>GO:0005773 vacuole                                                                                                               | GO:0003988 acetyl-CoA C-acyltransferase activity                                                                                                                                                                                                                                                |
| 29 | gi 25798095 gb CA754056.1 CA754056  | GO:0042218 1-aminocyclopropane-1-carboxylate biosynthetic process<br>GO:0009853 photorespiration<br>GO:0006522 alanine metabolic process<br>GO:0006531 aspartate metabolic process<br>GO:0006544 glycine metabolic process<br>GO:0006563 L-serine metabolic process<br>GO:0006566 threonine metabolic process<br>GO:0015976 carbon utilization                                                                                                                                                                       | GO:0005777 peroxisome<br>GO:0009570 chloroplast stroma<br>GO:0005829 cytosol                                                                              | GO:0008453 alanine-glyoxylate transaminase activity<br>GO:0030170 pyridoxal phosphate binding<br>GO:0004021 L-alanine:2-oxoglutarate aminotransferase activity<br>GO:0047958 glycine:2-oxoglutarate aminotransferase activity<br>GO:0016847 1-aminocyclopropane-1-carboxylate synthase activity |
| 30 | gi 226763339 gb GO519325.1 GO519325 | GO:0009813 flavonoid biosynthetic process<br>GO:0009733 response to auxin stimulus<br>GO:0055114 oxidation-reduction process                                                                                                                                                                                                                                                                                                                                                                                         | GO:0005789 endoplasmic reticulum membrane<br>GO:0016021 integral to                                                                                       | GO:0016711 flavonoid 3'-monooxygenase activity<br>GO:0009055 electron carrier activity<br>GO:0020037 heme binding                                                                                                                                                                               |

|    |                                     |                                                                                                                                                                                                                                                                                                                                                                                                                                                                                           |                                                                                                                                                                                            |                                                                                                                                        |
|----|-------------------------------------|-------------------------------------------------------------------------------------------------------------------------------------------------------------------------------------------------------------------------------------------------------------------------------------------------------------------------------------------------------------------------------------------------------------------------------------------------------------------------------------------|--------------------------------------------------------------------------------------------------------------------------------------------------------------------------------------------|----------------------------------------------------------------------------------------------------------------------------------------|
|    |                                     | GO:0009411 response to UV<br>GO:0006118 electron transport                                                                                                                                                                                                                                                                                                                                                                                                                                | membrane                                                                                                                                                                                   | GO:0019825 oxygen binding                                                                                                              |
| 31 | gi 49633098 gb CO416850.1 CO416850  | GO:0006412 translation<br>GO:0042254 ribosome biogenesis                                                                                                                                                                                                                                                                                                                                                                                                                                  | GO:0005730 nucleolus<br>GO:0009506 plasmodesma<br>GO:0005886 plasma membrane<br>GO:0022625 cytosolic large ribosomal subunit<br>GO:0009507 chloroplast<br>GO:0005783 endoplasmic reticulum | GO:0003735 structural constituent of ribosome                                                                                          |
| 32 | gi 8334112 gb BE039096.1 BE039096   | GO:0009759 indole glucosinolate biosynthetic process<br>GO:0000162 tryptophan biosynthetic process<br>GO:0010114 response to red light<br>GO:0052544 defense response by callose deposition in cell wall<br>GO:0048830 adventitious root development<br>GO:0009411 response to UV<br>GO:0009684 indoleacetic acid biosynthetic process<br>GO:0009641 shade avoidance<br>GO:0055114 oxidation-reduction process<br>GO:0009682 induced systemic resistance<br>GO:0006118 electron transport | GO:0005783 endoplasmic reticulum<br>GO:0005886 plasma membrane<br>GO:0005739 mitochondrion                                                                                                 | GO:0020037 heme binding<br>GO:0009055 electron carrier activity<br>GO:0033771 licodione synthase activity<br>GO:0019825 oxygen binding |
| 33 | gi 203711834 gb GD250318.1 GD250318 | GO:0006555 methionine metabolic process<br>GO:0055114 oxidation-reduction process<br>GO:0046653 tetrahydrofolate metabolic process                                                                                                                                                                                                                                                                                                                                                        |                                                                                                                                                                                            | GO:0004489 methylenetetrahydrofolate reductase (NADPH) activity                                                                        |
| 34 | gi 25802318 gb CA758279.1 CA758279  | GO:0006694 steroid biosynthetic process<br>GO:0016114 terpenoid biosynthetic process                                                                                                                                                                                                                                                                                                                                                                                                      | GO:0016021 integral to membrane                                                                                                                                                            | GO:0004310 farnesyl-diphosphate farnesyltransferase activity                                                                           |
| 35 | gi 219524684 gb GH456542.1 GH456542 | GO:0000162 tryptophan biosynthetic process<br>GO:0006571 tyrosine biosynthetic process<br>GO:0009094 L-phenylalanine biosynthetic process                                                                                                                                                                                                                                                                                                                                                 | GO:0009536 plastid                                                                                                                                                                         | GO:0004834 tryptophan synthase activity                                                                                                |
